# Supplementary material for: Design, synthesis, in vitro, and in silico biological evaluations of new coumarin-indole hybrids as anti-α-glucosidase agents
Source: Research Square preprint supplement (doi:10.21203/rs.3.rs-1808166/v1), 2022-07-15

**Graphical abstract**

**Design, synthesis, *in vitro*, and *in silico* biological evaluations of new coumarin-indole hybrids as anti-α-glucosidase agents**

Davood Rezapour Niri, Mohammad Hosein Sayahi, Somayeh Behrouz, Ali Moazzam, Somayeh Mojtabavi, Mohammad Ali Faramarzi, Bagher Larijani, Hossein Rastegar, Maryam Mohammadi-Khanaposhtani*, Mohammad Mahdavi*


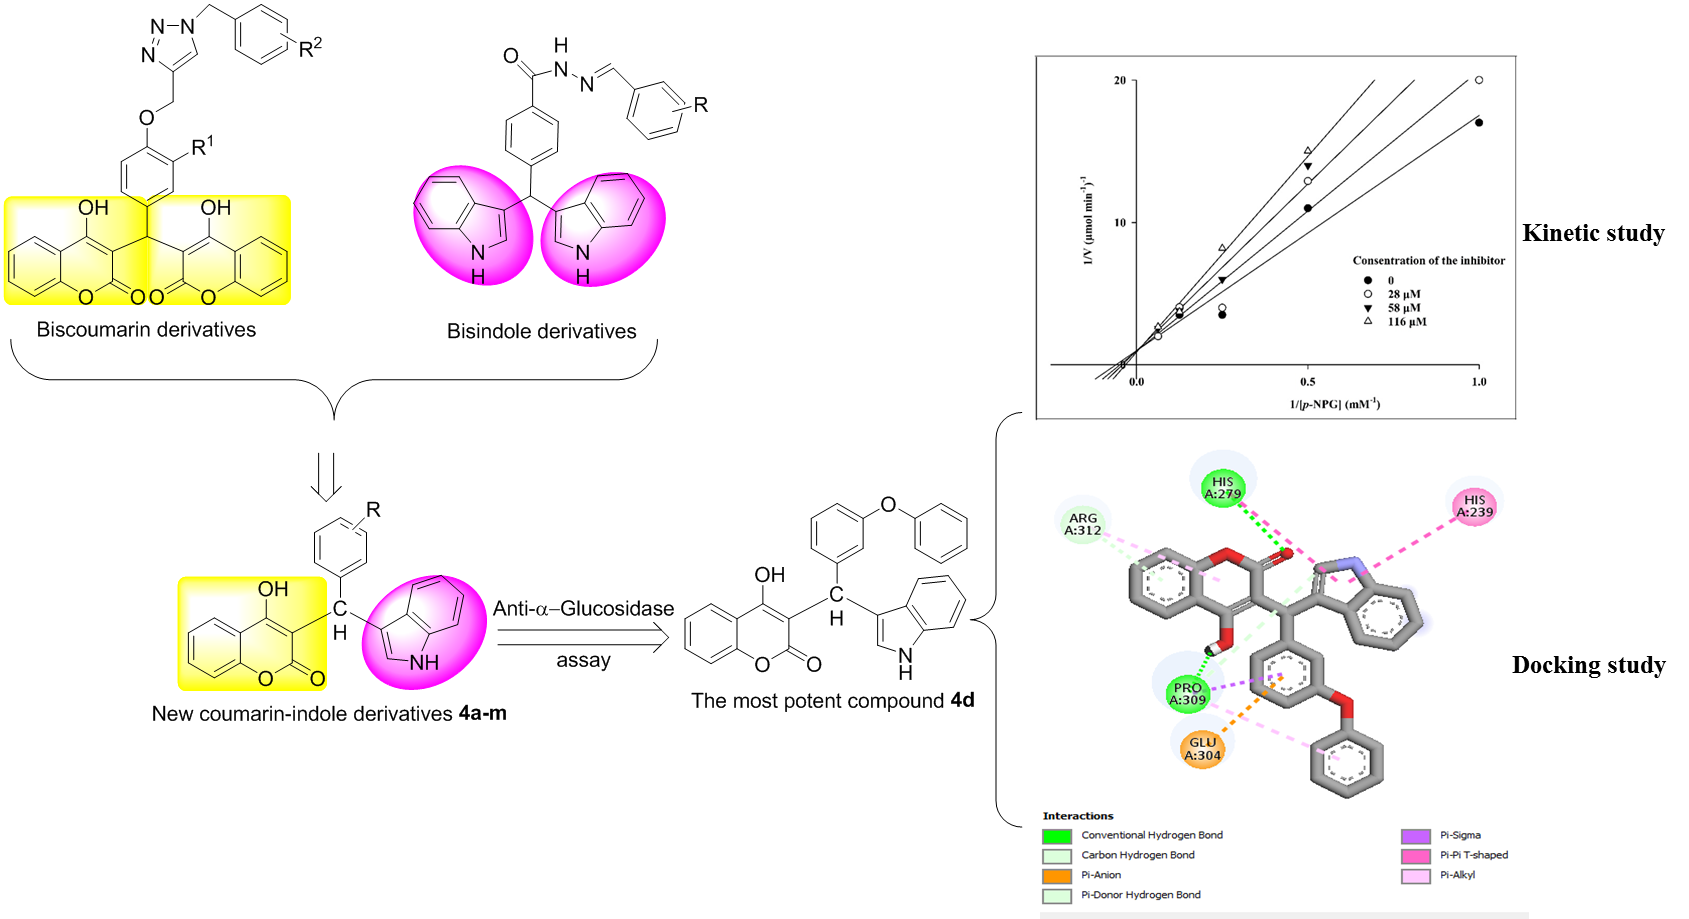

Supplement: Supplementary file 1 [file e5ab28be85b330445bb0c274.docx]
